# Supplementary material for: Mesoporous carbon-confined Au catalysts with superior activity for selective oxidation of glucose to gluconic acid
Source: Royal Society of Chemistry journal article supplement (doi:10.1039/c3gc36891b), 2013-01-01
Supplement: c3gc36891b.pdf [file c3gc36891b.pdf]

## Supporting information

### **Mesoporous carbon confined gold catalysts with superior activity for selective oxidation of glucose to gluconic acid**

*Chunyan Ma,<sup>a</sup> Wenjuan Xue,<sup>a</sup> Jinjun Li,<sup>a</sup> Wei Xing<sup>\*b</sup> and Zhengping Hao<sup>\*a</sup>*

<sup>a</sup> Department of Environmental Nano-materials, Research Center for Eco-Environmental Sciences, Chinese Academy of Sciences, Beijing 100085, P. R. China

<sup>b</sup> School of Science, State Key Laboratory of Heavy Oil Processing, Key Laboratory of Catalysis, China University of Petroleum, Qingdao 266555, P. R. China

[\*] E-mails: [zpinghao@rcees.ac.cn](mailto:zpinghao@rcees.ac.cn); [xingwei@upc.edu.cn](mailto:xingwei@upc.edu.cn)

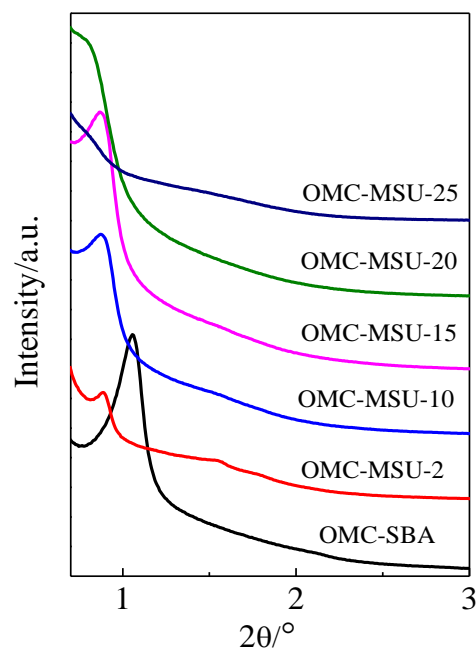

**Figure S1** Small angle X-ray diffraction of the OMC supports.

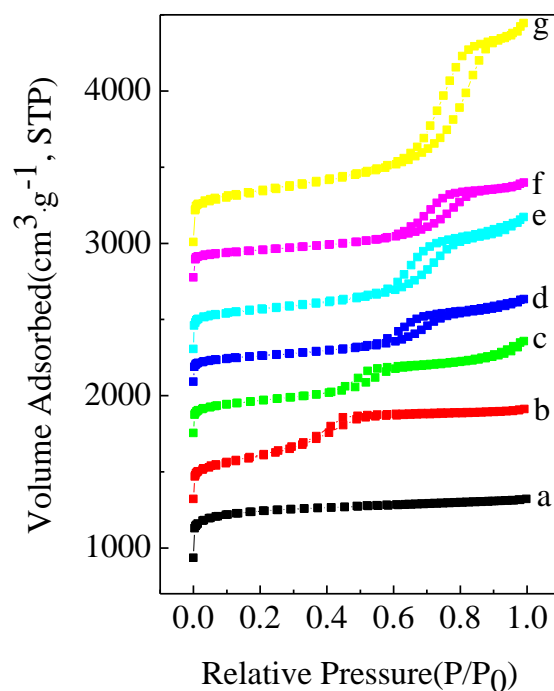

**Figure S2** N<sub>2</sub> adsorption/desorption isotherms of the catalysts. (a) Au/AC; (b) Au/OMC-SBA; (c) Au/OMC-MSU-2; (d) Au/OMC-MSU-10; (e) Au/OMC-MSU-15; (f) Au/OMC-MSU-20; (g) Au/OMC-MSU-25. The isotherm curves a, b, c, d, e, f and g in panel are shifted by 917, 1313, 1752, 2088, 2300, 2772 and 3001 cm<sup>3</sup>·g<sup>-1</sup>, STP, respectively, for clarity.

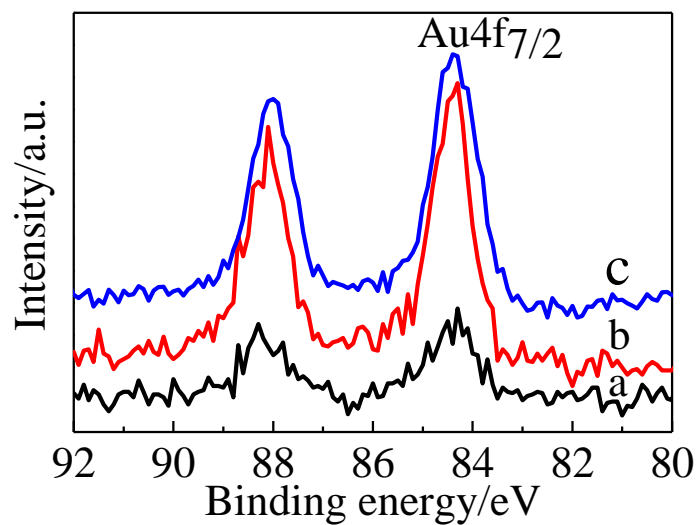

**Figure S3** XPS Au 4f spectra obtained for the Au/OMC catalysts. (a) Au/OMC-SBA; (b) Au/OMC-MSU-10; (c) Au/OMC-MSU-15.

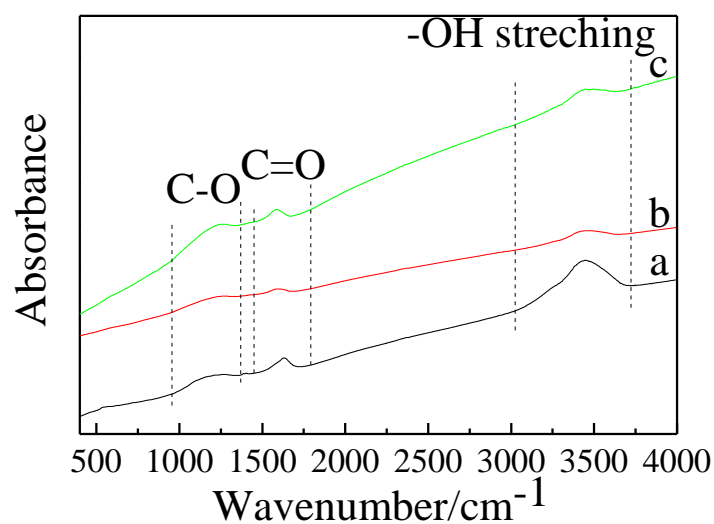

**Figure S4** IR spectra of the Au/OMC catalysts. (a) Au/OMC-MSU-2; (b) Au/OMC-MSU-20; (c) Au/OMC-MSU-25.

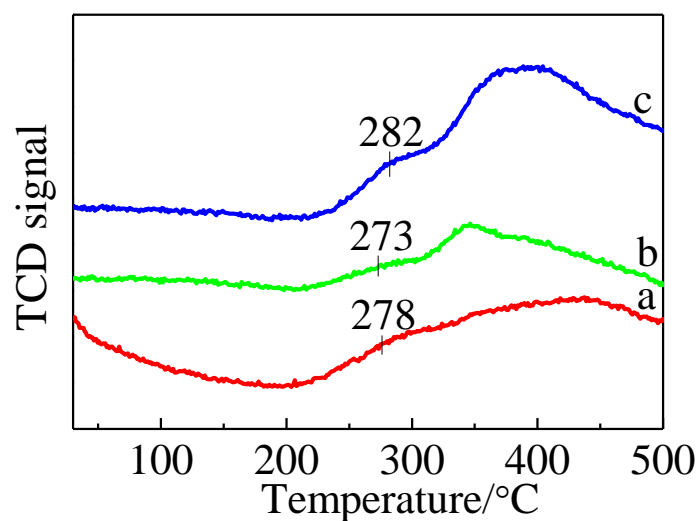

**Figure S5** O<sub>2</sub>-TPD profiles of the Au/OMC catalysts (a) Au/OMC-MSU-2; (b) Au/OMC-MSU-20; (c) Au/OMC-MSU-25.

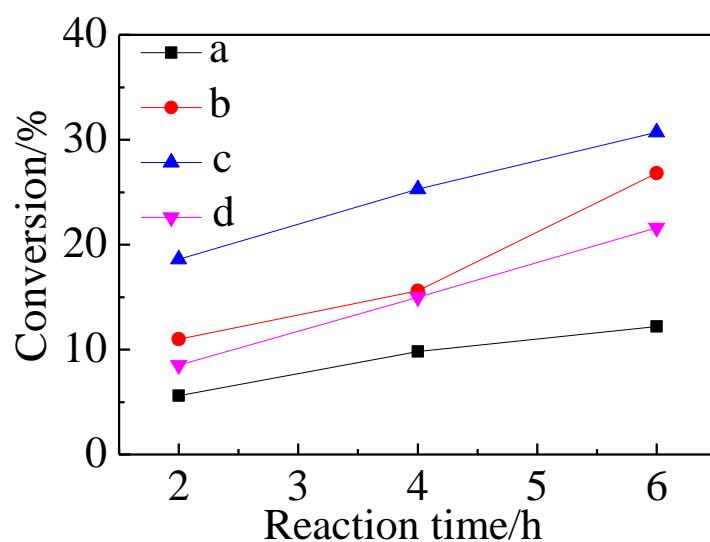

**Figure S6** Influence of reaction time on the oxidation of glucose using the Au/OMC catalysts. (a) Au/OMC-SBA; (b) Au/OMC-MSU-2; (c) Au/OMC-MSU-10; (d) Au/OMC-MSU-20.
